# Supplementary material
Source: PubMed Central journal article supplement (PMC11029013)
Supplement: 262_2012_1239_MOESM1_ESM.pdf [file 262_2012_1239_MOESM1_ESM.pdf]

## Supplementary Figure legends

### **Supplementary Fig. 1: Expression of putative CTA in HL cells (HG\_U133A analysis).**

Putative HL-associated CTA were identified by using MAFilter software ([http://steingrube-home.de/software\\_MAFilter.html](http://steingrube-home.de/software_MAFilter.html)) as described in the text. The following GEO data sets have been used: GSE26325, GSE2361. Presented is a cluster analysis with the identified probe sets (log<sub>2</sub> transformed and median centered signal intensities, absolute Manhattan distance, complete linkage clustering). Cluster analysis was performed with Genesis.

**Supplementary Fig. 2: Expression of ZBTB32 in HL cells.** Quantitative RT-PCR was used for quantification of ZBTB32 transcripts in HL cell lines and other samples. PBMC were separated into the indicated cell lineages. No signal was obtained for SK-N-MC cells after 40 cycles of PCR. For the calculation of relative expression values, ACTB was used as housekeeping control and expression in testis (not shown) was set as 1.

**Supplementary Fig. 3: Expression of PRAME in HL cells.** Quantitative RT-PCR was used for quantification of PRAME transcripts in HL cells. L-540 cells were cultured for the indicated time in the presence or in the absence of 5 $\mu$ M 5'-azacytidine. For calculation of relative expression values, glyceraldehyde-3-phosphate dehydrogenase was used as housekeeping control and expression in untreated L-540 cells on day zero was set as 1. Presented are means and standard deviation from three independent experiments. Asterisk indicate statistical significance (p<0.05).

**Supplementary Fig. 4: Sequence of PRAME protein from HL cell lines.** Presented are amino acid sequences of PRAME from HL cell lines. The position of known HLA-A2 binding peptides from PRAME is indicated by solid black lines. The position of a known HLA-B62 binding peptide is indicated by a solid blue line. The position of a known HLA-A24 binding peptide from PRAME is indicated by a dashed line. The X at position 47 of HDLM-2 denotes heterozygosity (L/M; single nucleotide polymorphism rs41310248). Data visualization was performed with GeneDoc (<http://www.psc.edu/biomed/genedoc>).

**Supplementary Fig. 5: Characterization of T cells after DC stimulation *in vitro*.** PBMC ( $5 \times 10^6$ ) were primed with DC ( $1 \times 10^6$ ) that had been transfected with total RNA from cell line HDLM-2. Cells were analyzed by flow cytometry using antibodies with specificity for the indicated surface molecules.

**Supplementary Fig. 6: Specificity of PRAME stimulated PBMC.** HLA-A2-positive PBMC were primed with T2 cells that had been pulsed with 100 $\mu$ g/ml of PRAME-derived peptide SLY or LIPI-derived peptide SLS, respectively. Both peptides have similar HLA-A2 stabilization activity (n-fold increase in HLA-A2 mean fluorescence intensity of T2 cells pulsed with PRAME peptide: 1.428; LIPI peptide: 1.433). Reactivity of stimulated cells with peptide-pulsed T2 cells was assessed by lactate dehydrogenase assay. For this end, target cells had been pulsed with PRAME derived peptides or peptides derived from the irrelevant antigen LIPI. Presented are means from three experiments after background subtraction. \*\* denotes statistical significance (p<0.005).

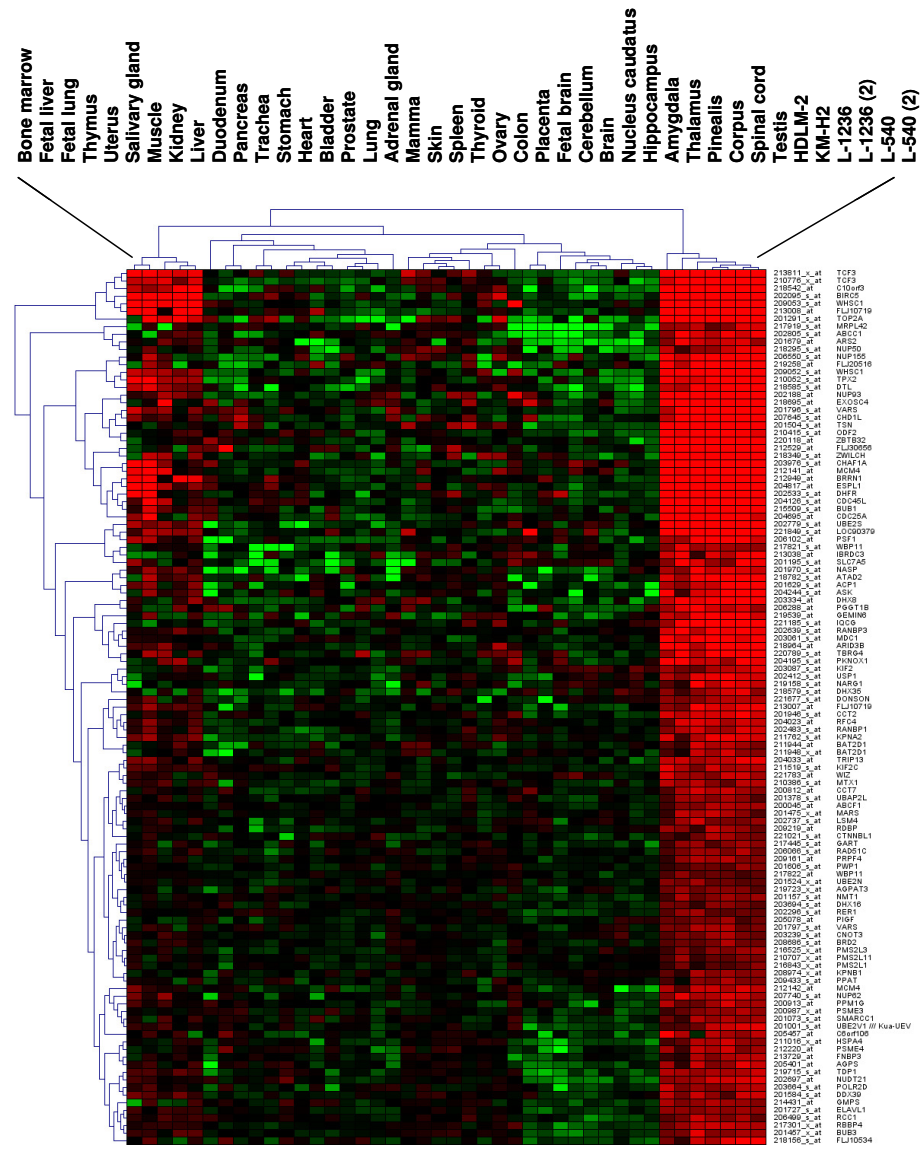

Supplementary Figure 1

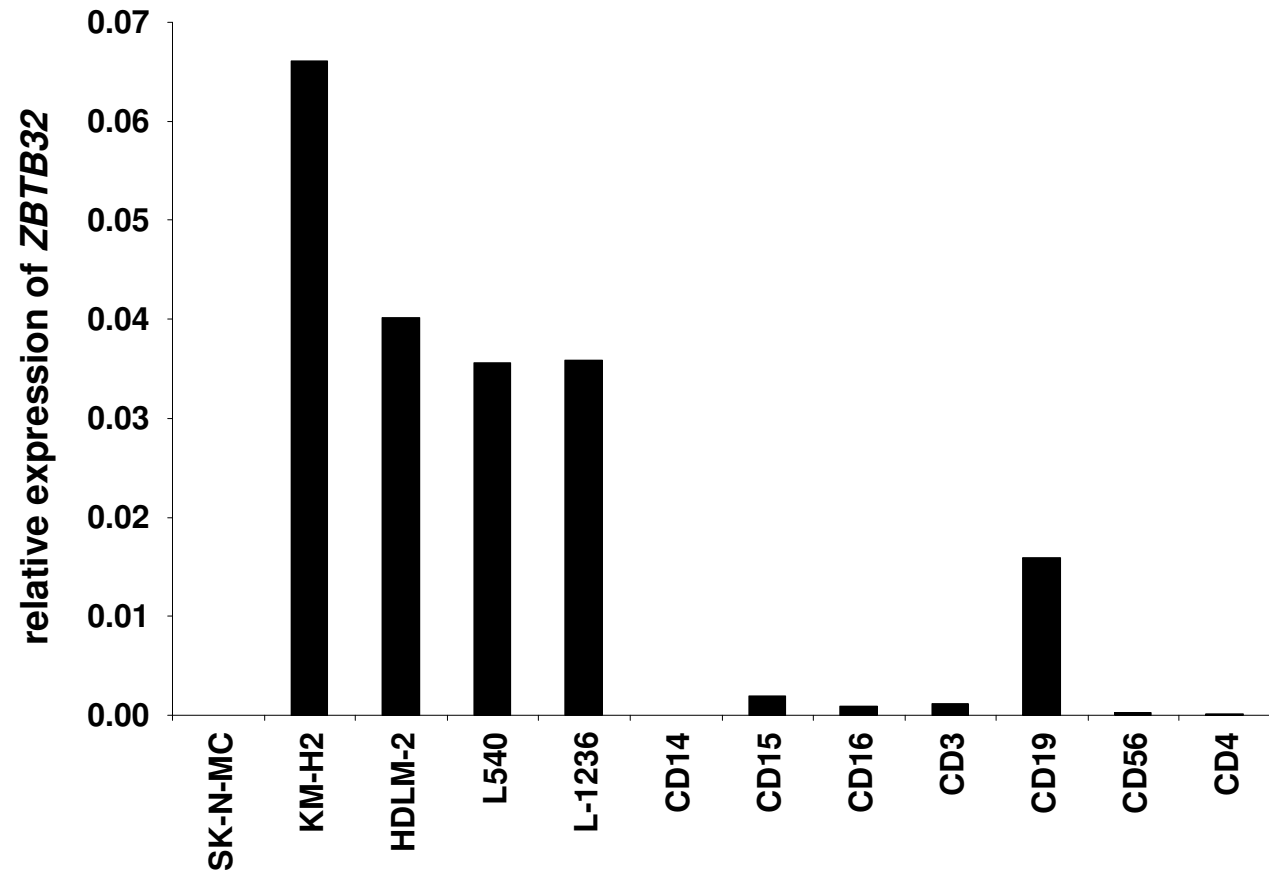

Supplementary Figure 2

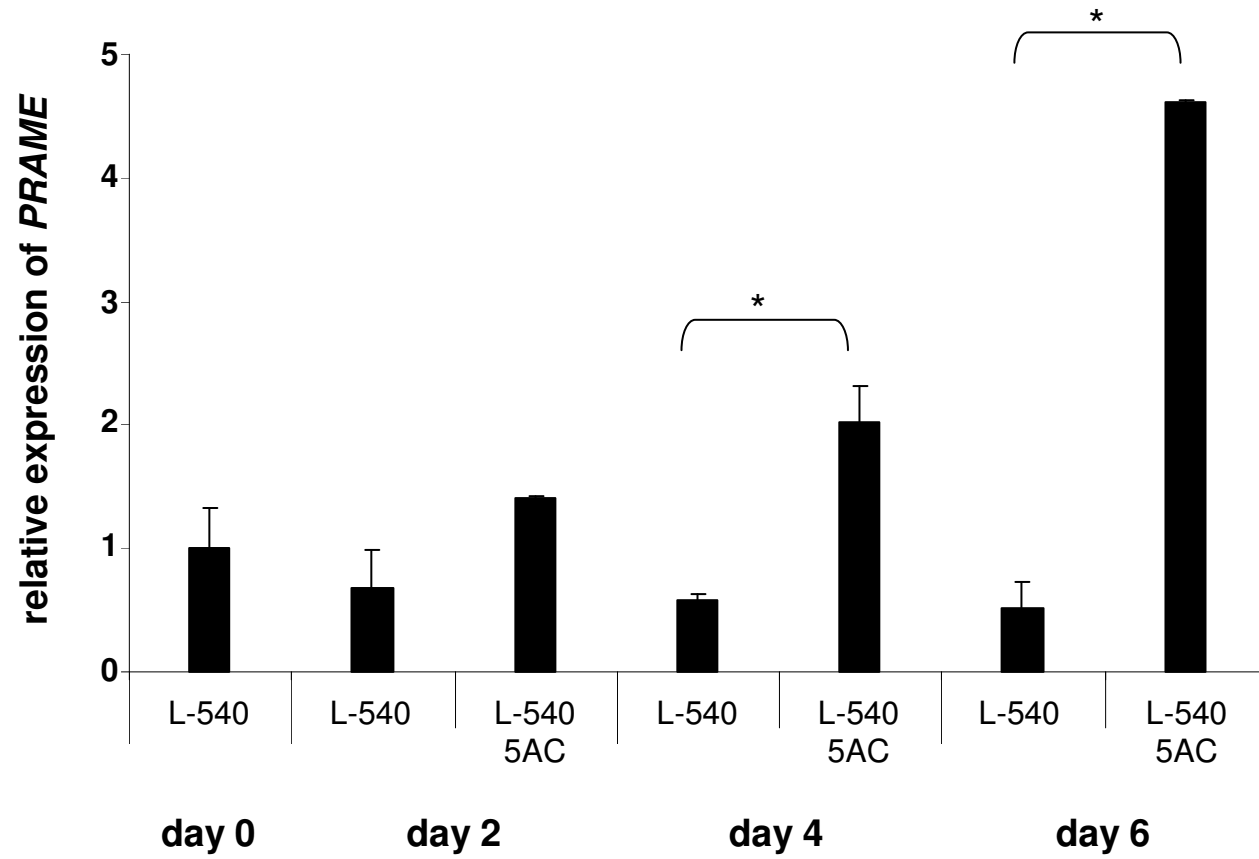

**Supplementary Figure 3**

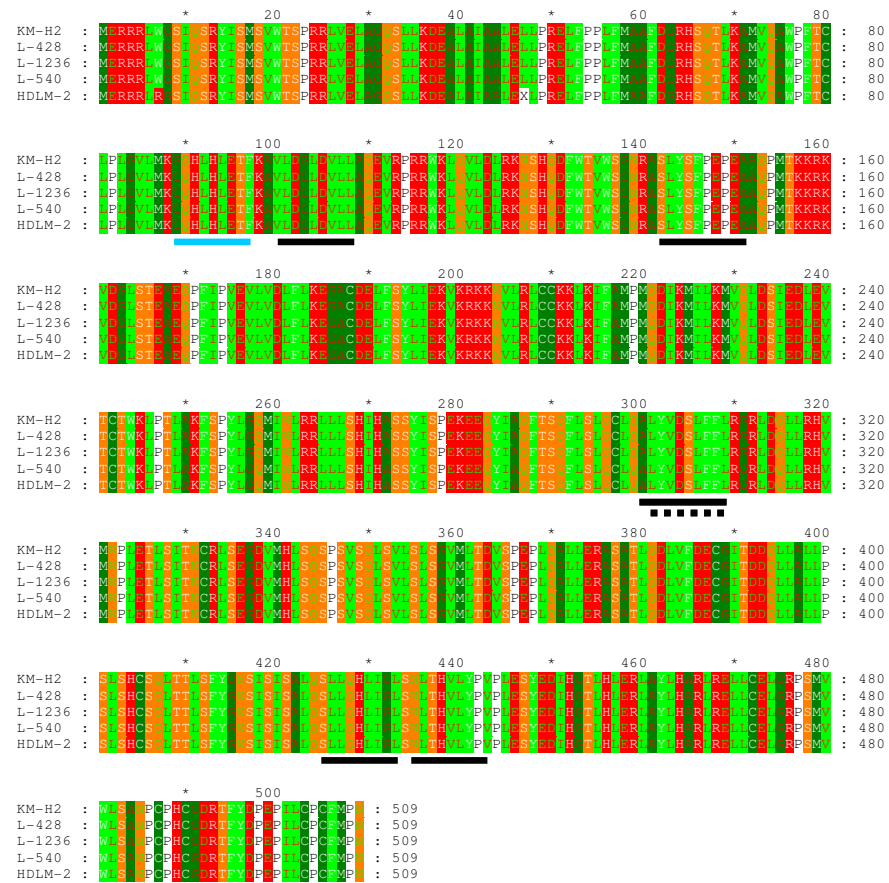

Supplementary Figure 4

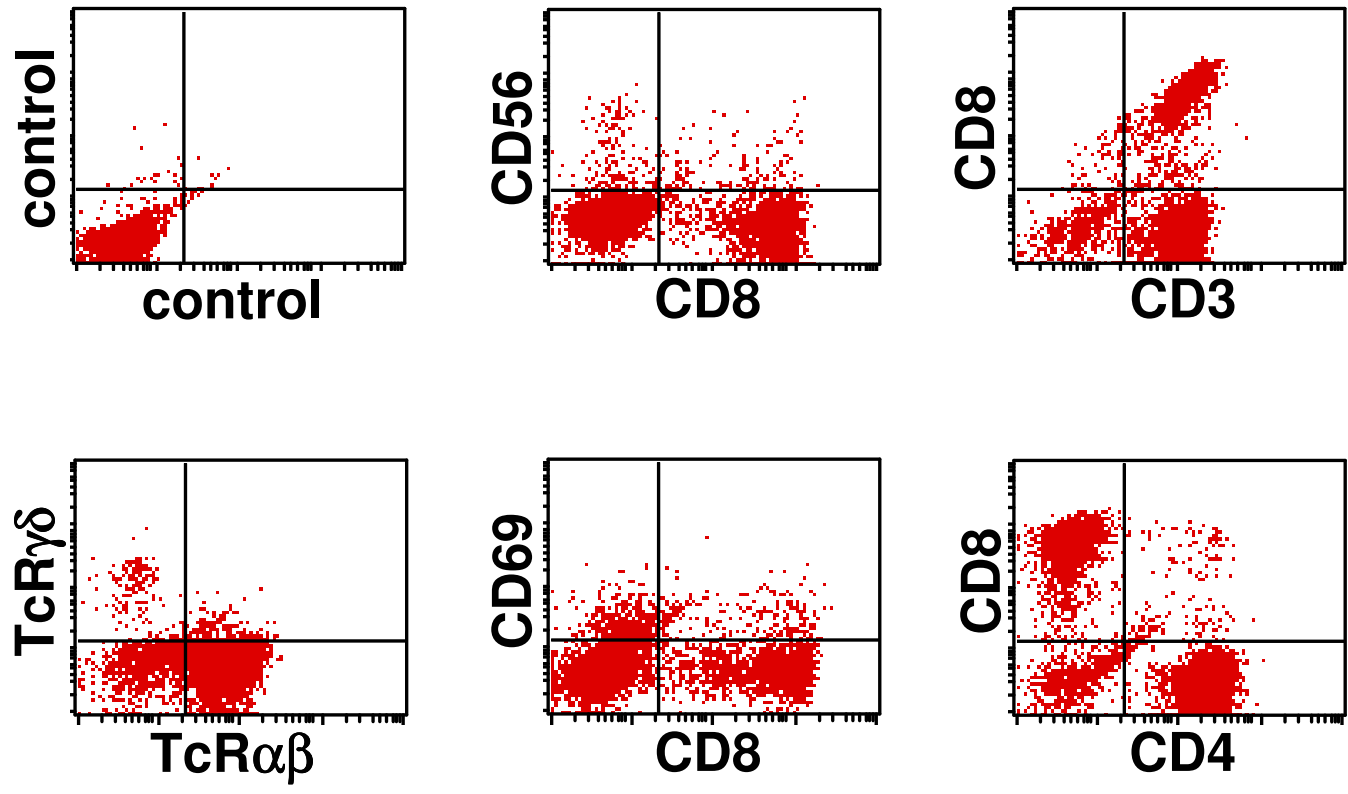

Supplementary Figure 5

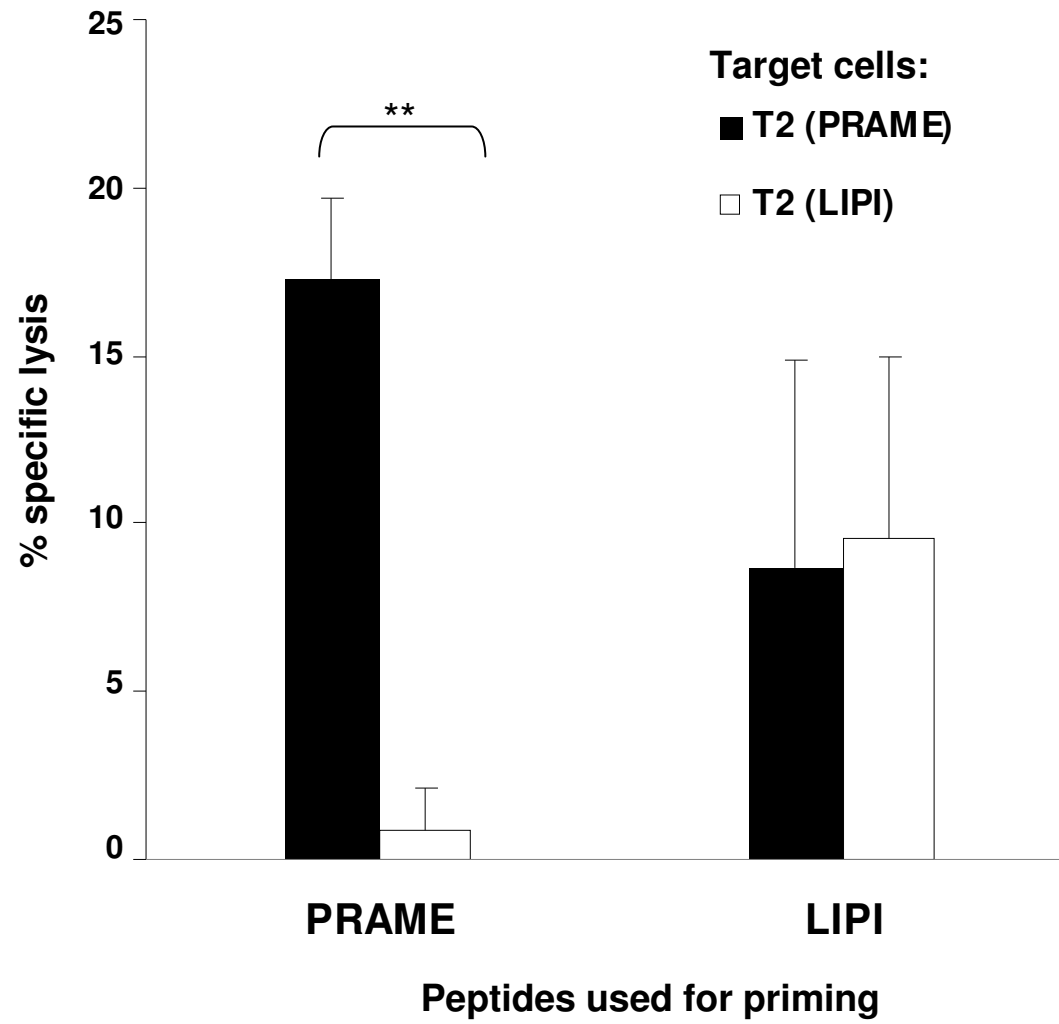

Supplementary Figure 6

**Supplementary Table 1. Detection of HL-reactivity in primed PBMC by interferon-gamma-ELISPOT. DC were transfected with total RNA (50µg/mL) or mRNA (10µg/mL; isolated with µMACS mRNA isolation kit, Miltenyi, Bergisch-Gladbach, Germany; donor 6) from HL cell lines and used as antigen presenting cells for PBMC from the same donors. On day 7, primed PBMC were re-stimulated with RNA transfected DC. Six days after re-stimulation, the reactivity of stimulated cells against indicated cell lines was assessed by interferon gamma ELISPOT. Different sarcoma cells, autologous PBMC (autol. PBMC) or allogeneic PBMC (allo. PBMC) served as controls. Presented are mean spot numbers per well from triplicates or quadruplicates (donor 6) from 9 independent experiments. -: not done. If not otherwise stated, 5x10<sup>4</sup> responder PBMC were used.**

| Donor number | Transfected RNA                   | Stimulatory cells used in ELISPOT assay |       |        |       |       |           |             |            |         |      |        |
|--------------|-----------------------------------|-----------------------------------------|-------|--------|-------|-------|-----------|-------------|------------|---------|------|--------|
|              |                                   | HDLM-2                                  | KM-H2 | L-1236 | L-428 | L-540 | L-540+5AC | autol. PBMC | allo. PBMC | SK-N-MC | A673 | TE-671 |
| 1(Exp.1)     | HDLM-2 (1x10 <sup>5</sup> PBMC)   | 190                                     | -     | -      | -     | -     | -         | 60          | 0          | -       | -    | 45     |
| 1(Exp.1)     | HDLM-2                            | 249                                     | -     | -      | -     | -     | -         | 0           | 10         | -       | -    | 6      |
| 1(Exp.2)     | HDLM-2 (1x10 <sup>5</sup> PBMC)   | 208                                     | 130   | 14     | -     | 0     | -         | 17          | -          | -       | -    | 16     |
| 1(Exp.2)     | HDLM-2                            | 42                                      | 37    | 0      | -     | 0     | -         | 0           | -          | -       | -    | 0      |
| 2(Exp.3)     | HDLM-2                            | 40                                      | 9     | 166    | -     | 19    | -         | -           | -          | -       | -    | -      |
| 2(Exp.3)     | KM-H2                             | 0                                       | 43    | 130    | -     | 67    | -         | -           | -          | -       | -    | -      |
| 2(Exp.3)     | L-1236                            | 3                                       | 11    | 127    | -     | 49    | -         | -           | -          | -       | -    | -      |
| 2(Exp.3)     | L-540                             | 0                                       | 44    | 162    | -     | 14    | -         | -           | -          | -       | -    | -      |
| 3(Exp.4)     | HDLM-2                            | 9                                       | 80    | 142    | -     | 0     | -         | -           | -          | 0       | 0    | -      |
| 3(Exp.4)     | KM-H2                             | 33                                      | 16    | 111    | -     | 12    | -         | -           | -          | 73      | 0    | -      |
| 3(Exp.4)     | L-1236                            | 32                                      | 0     | 173    | -     | 19    | -         | -           | -          | 38      | 0    | -      |
| 3(Exp.4)     | L-540                             | 18                                      | 0     | 103    | -     | 9     | -         | -           | -          | 55      | 0    | -      |
| 4(Exp.5)     | HDLM-2                            | 33                                      | 19    | 65     | -     | 0     | -         | -           | -          | -       | -    | -      |
| 4(Exp.5)     | KM-H2                             | 34                                      | 35    | 82     | -     | 0     | -         | -           | -          | -       | -    | -      |
| 4(Exp.5)     | L-1236                            | 26                                      | 28    | 70     | -     | 0     | -         | -           | -          | -       | -    | -      |
| 4(Exp.5)     | L-540                             | 19                                      | 20    | 55     | -     | 0     | -         | -           | -          | -       | -    | -      |
| 5(Exp.6)     | L-1236                            | 70                                      | 87    | 104    | -     | 14    | -         | -           | -          | 124     | 90   | -      |
| 6(Exp.7)     | L-1236 (2.5x10 <sup>4</sup> PBMC) | 24                                      | 10    | 106    | -     | 13    | -         | -           | -          | -       | -    | -      |
| 7(Exp.8)     | HDLM-2                            | 61                                      | 83    | 22     | 82    | 439   | 185       | 0           | -          | 1       | 3    | 25     |
| 8(Exp.9)     | HDLM-2                            | 41                                      | 58    | 6      | -     | 131   | 61        | 0           | -          | 1       | 1    | 0      |



**Supplementary Table 2. Putative HL-associated CTA (HG\_U133A data base). Putative HL-associated CTA were identified in Affymetrix HG\_U133A microarray data sets by using MAFilter ([http://steingrube-home.de/software\\_MAFilter.html](http://steingrube-home.de/software_MAFilter.html)) as described in the text. Presented are probe set IDs of putative CTA, corresponding gene symbols, signal intensities in testis, HL cell lines and normal tissues (NBA) and the quotients of the variances in the merged groups and the variance in normal tissues (see the main text of the manuscript for details).**

| <b>Probe Set ID</b> | <b>Gene Symbol</b> | <b>Signal intensity testis</b> | <b>Mean signal intensity HL lines</b> | <b>Mean signal intensity NBA</b> | <b>variance (NBA+testis) / variance (NBA)</b> | <b>variance (NBA+HL) / variance (NBA)</b> |
|---------------------|--------------------|--------------------------------|---------------------------------------|----------------------------------|-----------------------------------------------|-------------------------------------------|
| 200045_at           | ABCF1              | 2267                           | 4920.3                                | 1222.3                           | 1.6                                           | 36.5                                      |
| 200812_at           | CCT7               | 2646                           | 6059.0                                | 1390.6                           | 1.1                                           | 10.9                                      |
| 200913_at           | PPM1G              | 2032                           | 1688.5                                | 438.1                            | 3.1                                           | 8.4                                       |
| 200987_x_at         | PSME3              | 1184                           | 2324.0                                | 675.7                            | 1.1                                           | 9.5                                       |
| 201001_s_at         | UBE2V1 /// Ku      | 828                            | 2061.5                                | 418.8                            | 1.1                                           | 17.8                                      |
| 201073_s_at         | SMARCC1            | 851                            | 1209.2                                | 344.7                            | 1.4                                           | 7.1                                       |
| 201157_s_at         | NMT1               | 1329                           | 2451.2                                | 695.5                            | 1.4                                           | 16.9                                      |
| 201195_s_at         | SLC7A5             | 2032                           | 4434.3                                | 655.8                            | 1.2                                           | 10.9                                      |
| 201291_s_at         | TOP2A              | 760                            | 1884.3                                | 52.4                             | 3.4                                           | 98.6                                      |
| 201378_s_at         | UBAP2L             | 999                            | 1822.7                                | 540.0                            | 1.2                                           | 8.5                                       |
| 201457_x_at         | BUB3               | 2874                           | 4425.2                                | 1146.7                           | 1.3                                           | 8.3                                       |
| 201475_x_at         | MARS               | 2385                           | 6101.3                                | 1498.7                           | 1.2                                           | 29.4                                      |
| 201504_s_at         | TSN                | 736                            | 988.5                                 | 73.0                             | 3.7                                           | 29.6                                      |
| 201524_x_at         | UBE2N              | 5287                           | 4447.8                                | 1653.2                           | 3.5                                           | 8.9                                       |
| 201584_s_at         | DDX39              | 4366                           | 3640.0                                | 982.2                            | 2.6                                           | 7.0                                       |
| 201606_s_at         | PWP1               | 1223                           | 2065.8                                | 775.3                            | 1.1                                           | 8.5                                       |
| 201629_s_at         | ACP1               | 1058                           | 1723.3                                | 250.3                            | 1.6                                           | 11.9                                      |
| 201679_at           | ARS2               | 249                            | 474.8                                 | 70.7                             | 1.3                                           | 8.4                                       |
| 201727_s_at         | ELAVL1             | 1586                           | 1559.8                                | 450.1                            | 2.4                                           | 7.3                                       |
| 201796_s_at         | VAR5               | 322                            | 714.5                                 | 97.6                             | 1.2                                           | 8.3                                       |
| 201797_s_at         | VAR5               | 847                            | 1048.8                                | 304.8                            | 2.0                                           | 11.2                                      |
| 201946_s_at         | CCT2               | 4226                           | 4299.8                                | 717.2                            | 4.9                                           | 20.8                                      |
| 201970_s_at         | NASP               | 1340                           | 1892.5                                | 315.8                            | 1.4                                           | 6.3                                       |
| 202095_s_at         | BIRC5              | 736                            | 1352.8                                | 126.5                            | 1.2                                           | 5.6                                       |
| 202188_at           | NUP93              | 678                            | 1372.5                                | 111.4                            | 1.7                                           | 17.5                                      |
| 202296_s_at         | RER1               | 3451                           | 4496.7                                | 1608.4                           | 1.4                                           | 6.1                                       |

|             |          |      |         |        |      |       |
|-------------|----------|------|---------|--------|------|-------|
| 202412_s_at | USP1     | 809  | 1101.0  | 166.0  | 3.2  | 24.4  |
| 202483_s_at | RANBP1   | 2768 | 4815.2  | 979.3  | 1.4  | 10.2  |
| 202533_s_at | DHFR     | 161  | 478.8   | 29.6   | 1.2  | 17.0  |
| 202639_s_at | RANBP3   | 370  | 470.8   | 63.9   | 5.2  | 37.1  |
| 202697_at   | NUDT21   | 1615 | 2603.3  | 458.5  | 1.7  | 14.0  |
| 202737_s_at | LSM4     | 1755 | 3301.3  | 927.9  | 1.2  | 9.8   |
| 202779_s_at | UBE2S    | 3726 | 10603.0 | 466.5  | 3.0  | 95.7  |
| 202805_s_at | ABCC1    | 611  | 1380.5  | 172.9  | 1.3  | 14.5  |
| 203061_s_at | MDC1     | 600  | 332.8   | 34.7   | 91.4 | 133.6 |
| 203087_s_at | KIF2     | 2172 | 2441.7  | 595.6  | 1.8  | 7.6   |
| 203239_s_at | CNOT3    | 458  | 710.3   | 231.7  | 1.3  | 9.1   |
| 203334_at   | DHX8     | 221  | 469.8   | 44.2   | 1.8  | 25.0  |
| 203664_s_at | POLR2D   | 1764 | 1131.7  | 297.2  | 5.1  | 7.5   |
| 203694_s_at | DHX16    | 1518 | 1474.2  | 551.2  | 2.3  | 7.1   |
| 203976_s_at | CHAF1A   | 145  | 427.7   | 22.7   | 1.2  | 13.6  |
| 204023_at   | RFC4     | 995  | 2318.5  | 437.3  | 1.2  | 12.1  |
| 204033_at   | TRIP13   | 1504 | 1663.2  | 325.7  | 2.2  | 8.8   |
| 204126_s_at | CDC45L   | 242  | 883.7   | 36.2   | 1.6  | 52.3  |
| 204195_s_at | PKNOX1   | 423  | 136.3   | 23.8   | 16.1 | 7.6   |
| 204244_s_at | ASK      | 3246 | 908.5   | 117.7  | 46.2 | 18.3  |
| 204695_at   | CDC25A   | 383  | 629.7   | 44.5   | 1.3  | 6.5   |
| 204817_at   | ESPL1    | 1029 | 1542.0  | 193.9  | 1.3  | 5.9   |
| 205078_at   | PIGF     | 1077 | 1216.0  | 437.0  | 1.7  | 7.0   |
| 205401_at   | AGPS     | 1439 | 1531.0  | 337.6  | 2.5  | 12.3  |
| 205457_at   | C6orf106 | 1403 | 646.8   | 170.8  | 7.8  | 7.1   |
| 206066_s_at | RAD51C   | 534  | 933.5   | 275.5  | 1.2  | 8.6   |
| 206102_at   | PSF1     | 668  | 1428.0  | 176.5  | 1.2  | 10.9  |
| 206288_at   | PGGT1B   | 83   | 132.5   | 24.4   | 1.3  | 6.4   |
| 206499_s_at | RCC1     | 676  | 1146.7  | 339.5  | 1.2  | 7.9   |
| 206550_s_at | NUP155   | 1827 | 777.0   | 72.0   | 21.5 | 17.5  |
| 207645_s_at | CHD1L    | 115  | 317.5   | 31.3   | 1.3  | 20.2  |
| 207740_s_at | NUP62    | 586  | 969.7   | 195.5  | 1.3  | 8.0   |
| 208686_s_at | BRD2     | 1433 | 1972.5  | 702.9  | 1.4  | 7.1   |
| 208974_x_at | KPNB1    | 3010 | 4314.0  | 1356.8 | 1.6  | 11.7  |
| 209052_s_at | WHSC1    | 600  | 1070.2  | 96.8   | 1.7  | 13.2  |
| 209053_s_at | WHSC1    | 1187 | 1658.5  | 116.8  | 1.6  | 7.6   |

|             |          |      |        |        |         |      |
|-------------|----------|------|--------|--------|---------|------|
| 209161_at   | PRPF4    | 703  | 1713.5 | 457.9  | 1.2     | 25.5 |
| 209219_at   | RDBP     | 2391 | 2125.2 | 598.6  | 3.7     | 12.4 |
| 209433_s_at | PPAT     | 589  | 908.8  | 306.1  | 1.2     | 7.7  |
| 210052_s_at | TPX2     | 1746 | 3182.5 | 342.3  | 1.2     | 5.7  |
| 210386_s_at | MTX1     | 2779 | 2211.2 | 563.0  | 3.5     | 8.2  |
| 210415_s_at | ODF2     | 6484 | 161.8  | 15.3   | 23129.8 | 66.3 |
| 210707_x_at | PMS2L11  | 1158 | 1620.7 | 604.3  | 1.5     | 11.2 |
| 210776_x_at | TCF3     | 971  | 3047.2 | 243.6  | 1.1     | 14.3 |
| 211016_x_at | HSPA4    | 627  | 1363.5 | 297.5  | 1.2     | 11.4 |
| 211519_s_at | KIF2C    | 2025 | 1230.2 | 315.2  | 6.6     | 9.0  |
| 211762_s_at | KPNA2    | 5980 | 5357.8 | 1079.5 | 2.3     | 6.5  |
| 211944_at   | BAT2D1   | 418  | 744.5  | 193.3  | 1.1     | 6.8  |
| 211948_x_at | BAT2D1   | 800  | 1618.3 | 403.1  | 1.1     | 11.1 |
| 212141_at   | MCM4     | 827  | 1431.8 | 94.3   | 2.0     | 19.7 |
| 212142_at   | MCM4     | 696  | 763.0  | 151.3  | 2.2     | 9.2  |
| 212220_at   | PSME4    | 593  | 593.3  | 146.0  | 2.1     | 7.4  |
| 212529_at   | FLJ30656 | 510  | 823.2  | 44.5   | 3.4     | 35.0 |
| 212949_at   | BRRN1    | 970  | 1052.0 | 89.4   | 2.4     | 9.7  |
| 213007_at   | FLJ10719 | 609  | 1222.7 | 194.5  | 1.3     | 11.8 |
| 213008_at   | FLJ10719 | 492  | 1157.7 | 51.0   | 1.7     | 26.1 |
| 213038_at   | IBRDC3   | 1837 | 1997.8 | 322.9  | 2.3     | 10.2 |
| 213729_at   | FNBP3    | 1373 | 3114.2 | 752.2  | 1.2     | 16.8 |
| 213811_x_at | TCF3     | 1497 | 3617.3 | 309.1  | 1.2     | 10.7 |
| 214431_at   | GMPS     | 1729 | 1426.2 | 393.1  | 2.9     | 6.4  |
| 215509_s_at | BUB1     | 398  | 639.3  | 33.1   | 5.3     | 70.4 |
| 216525_x_at | PMS2L3   | 1122 | 2068.0 | 647.0  | 1.2     | 9.9  |
| 216843_x_at | PMS2L1   | 1506 | 2160.8 | 910.9  | 1.2     | 6.3  |
| 217301_x_at | RBBP4    | 2712 | 5092.3 | 1059.6 | 1.5     | 15.0 |
| 217445_s_at | GART     | 126  | 236.0  | 68.1   | 1.1     | 7.5  |
| 217821_s_at | WBP11    | 1228 | 1738.7 | 363.2  | 1.7     | 10.7 |
| 217822_at   | WBP11    | 1597 | 1949.2 | 804.2  | 1.7     | 9.3  |
| 217919_s_at | MRPL42   | 1953 | 2490.8 | 452.7  | 1.6     | 7.0  |
| 218156_s_at | FLJ10534 | 577  | 1289.7 | 200.3  | 1.4     | 23.4 |
| 218295_s_at | NUP50    | 645  | 598.7  | 119.6  | 2.0     | 6.2  |
| 218349_s_at | ZWILCH   | 1386 | 596.5  | 34.3   | 51.5    | 45.7 |
| 218542_at   | C10orf3  | 1040 | 2147.3 | 68.2   | 3.3     | 59.3 |

|             |          |      |        |       |       |       |
|-------------|----------|------|--------|-------|-------|-------|
| 218579_s_at | DHX35    | 173  | 228.5  | 48.7  | 1.5   | 7.3   |
| 218585_s_at | DTL      | 568  | 1090.5 | 137.6 | 1.2   | 7.2   |
| 218695_at   | EXOSC4   | 917  | 1008.0 | 105.7 | 2.2   | 8.3   |
| 218782_s_at | ATAD2    | 748  | 1013.5 | 123.0 | 2.1   | 12.6  |
| 218964_at   | ARID3B   | 534  | 898.3  | 73.8  | 3.5   | 44.7  |
| 219158_s_at | NARG1    | 304  | 815.7  | 143.7 | 1.1   | 18.9  |
| 219258_at   | FLJ20516 | 493  | 463.5  | 50.1  | 4.0   | 14.5  |
| 219539_at   | GEMIN6   | 728  | 1078.7 | 139.6 | 2.2   | 16.6  |
| 219715_s_at | TDP1     | 1615 | 1532.7 | 350.1 | 2.4   | 6.6   |
| 219723_x_at | AGPAT3   | 600  | 698.7  | 228.1 | 1.6   | 6.2   |
| 220118_at   | ZBTB32   | 891  | 541.0  | 22.9  | 138.1 | 272.4 |
| 220789_s_at | TBRG4    | 428  | 969.3  | 143.7 | 1.2   | 9.2   |
| 221021_s_at | CTNBL1   | 555  | 847.5  | 265.2 | 1.2   | 7.4   |
| 221185_s_at | IQCG     | 922  | 3768.2 | 258.0 | 1.7   | 107.0 |
| 221677_s_at | DONSON   | 704  | 837.8  | 205.9 | 1.7   | 6.7   |
| 221783_at   | WIZ      | 641  | 432.0  | 107.7 | 5.4   | 9.4   |
| 221849_s_at | LOC90379 | 410  | 448.2  | 59.7  | 1.8   | 6.1   |

**Supplementary Table 3. Putative HL-associated CTA (HG\_U133Plus2.0 data base). Putative HL-associated CTA were identified in Affymetrix HG\_U133Plus2.0 microarray data sets by using MAFilter ([http://steingrube-home.de/software\\_MAFilter.html](http://steingrube-home.de/software_MAFilter.html)) as described in the text. Presented are probe set IDs of putative CTA, corresponding gene symbols, signal intensities (SI) in testis, micro-dissected HL cells (cHL), HL cell lines and normal tissues (NBA) and the quotients of the variances (var) in the merged groups and the variance in normal tissues (see the main text of the manuscript for details).**

| Probe Set ID | Gene symbol                                                                                | Mean SI testis | Mean SI NBA | Mean SI cHL | Mean SI HL lines | var (NBA+HL lines) / var (NBA) | var (NBA+cHL) / var (NBA) | var (NBA+testis) / var (NBA) |
|--------------|--------------------------------------------------------------------------------------------|----------------|-------------|-------------|------------------|--------------------------------|---------------------------|------------------------------|
| 1553167_a_at | SLA/LP                                                                                     | 312.5          | 114.0       | 439.4       | 542.5            | 3.1                            | 3.5                       | 1.1                          |
| 1553709_a_at | PRPF38A                                                                                    | 1597.6         | 775.9       | 1642.1      | 2488.8           | 3.3                            | 1.7                       | 1.2                          |
| 1553887_at   | FLJ40235                                                                                   | 1601.1         | 118.1       | 386.9       | 1324.7           | 52.9                           | 4.0                       | 13.2                         |
| 1555772_a_at | CDC25A                                                                                     | 459.4          | 87.4        | 285.7       | 884.3            | 10.0                           | 1.9                       | 1.5                          |
| 1555943_at   | PGAM5                                                                                      | 348.8          | 139.4       | 358.8       | 344.1            | 1.3                            | 1.8                       | 1.1                          |
| 1556588_at   | C15orf37                                                                                   | 492.5          | 244.9       | 881.3       | 494.1            | 1.7                            | 5.1                       | 1.1                          |
| 1556613_s_at | LOC203107                                                                                  | 462.5          | 159.0       | 292.6       | 383.6            | 1.6                            | 1.7                       | 1.2                          |
| 1559170_at   | ---                                                                                        | 455.0          | 126.0       | 1080.1      | 477.4            | 2.7                            | 13.3                      | 1.3                          |
| 1559668_s_at | ---                                                                                        | 235.3          | 68.7        | 330.2       | 159.1            | 1.5                            | 5.5                       | 1.2                          |
| 1559946_s_at | RUVBL2                                                                                     | 10722.1        | 2046.6      | 10905.7     | 10302.7          | 3.6                            | 4.3                       | 1.9                          |
| 1560916_a_at | DPY19L1                                                                                    | 1959.2         | 180.3       | 435.9       | 602.5            | 3.7                            | 1.8                       | 6.2                          |
| 1567912_s_at | RP13-36C9.1 /// RP13-36C9.3 /// CT45-4 /// RP13-36C9.6 /// CT45-6 /// CT45-1 /// LOC653515 | 773.2          | 42.2        | 3065.6      | 13547.5          | 10657.9                        | 1427.2                    | 7.9                          |
| 200055_at    | TAF10                                                                                      | 7820.1         | 2489.5      | 9606.3      | 7452.6           | 3.0                            | 5.3                       | 1.7                          |
| 200085_s_at  | TCEB2                                                                                      | 13333.0        | 5201.8      | 22889.3     | 9536.4           | 1.5                            | 9.4                       | 1.4                          |
| 200812_at    | CCT7                                                                                       | 4814.8         | 2123.0      | 8118.1      | 15598.4          | 16.2                           | 4.2                       | 1.2                          |
| 200868_s_at  | ZNF313                                                                                     | 10445.9        | 846.1       | 1800.7      | 2227.9           | 4.3                            | 2.8                       | 26.9                         |
| 200987_x_at  | PSME3                                                                                      | 1616.2         | 627.8       | 1424.5      | 2331.4           | 3.3                            | 1.9                       | 1.2                          |
| 201077_s_at  | NHP2L1                                                                                     | 7051.9         | 2923.6      | 5365.7      | 10738.6          | 6.6                            | 1.7                       | 1.5                          |
| 201459_at    | RUVBL2                                                                                     | 8050.9         | 944.3       | 4420.7      | 7002.3           | 5.7                            | 2.5                       | 3.1                          |
| 201482_at    | QSCN6                                                                                      | 2981.6         | 919.1       | 2441.8      | 947.9            | 1.1                            | 2.2                       | 1.2                          |
| 201521_s_at  | NCBP2                                                                                      | 815.9          | 366.2       | 1358.1      | 1427.9           | 3.9                            | 3.0                       | 1.1                          |
| 201524_x_at  | UBE2N                                                                                      | 7459.1         | 2721.3      | 6470.8      | 10466.0          | 8.0                            | 2.6                       | 1.6                          |

|             |                    |         |         |         |         |       |      |      |
|-------------|--------------------|---------|---------|---------|---------|-------|------|------|
| 201597_at   | COX7A2             | 28839.2 | 10406.8 | 50913.7 | 19291.8 | 1.5   | 13.6 | 1.7  |
| 201629_s_at | ACP1               | 1517.7  | 250.0   | 1273.1  | 5086.7  | 48.9  | 4.0  | 2.0  |
| 201937_s_at | DNPEP              | 1810.3  | 602.3   | 1262.8  | 1354.1  | 1.7   | 1.8  | 1.5  |
| 201947_s_at | CCT2               | 17224.0 | 4528.6  | 17140.4 | 20256.3 | 4.5   | 6.7  | 1.7  |
| 201999_s_at | DYNLT1             | 8358.8  | 3741.3  | 8978.6  | 7184.7  | 1.3   | 1.7  | 1.1  |
| 202296_s_at | RER1               | 4708.3  | 1904.5  | 4778.2  | 4394.3  | 1.9   | 2.1  | 1.3  |
| 202595_s_at | LEPROTL1           | 1849.2  | 748.9   | 1934.0  | 1888.1  | 1.9   | 2.1  | 1.2  |
| 202697_at   | NUDT21             | 2910.3  | 544.6   | 2176.9  | 4835.2  | 11.5  | 2.6  | 1.9  |
| 202737_s_at | LSM4               | 3419.9  | 1735.1  | 6579.5  | 6780.2  | 7.5   | 9.7  | 1.2  |
| 202824_s_at | TCEB1              | 6918.3  | 2731.0  | 11079.3 | 11448.3 | 6.5   | 7.2  | 1.3  |
| 203114_at   | SSSCA1             | 808.1   | 263.7   | 1023.7  | 946.7   | 2.6   | 3.1  | 1.3  |
| 203119_at   | CCDC86             | 2398.6  | 844.5   | 1799.8  | 1770.9  | 2.0   | 2.1  | 1.8  |
| 203436_at   | RPP30              | 1399.2  | 722.8   | 1400.7  | 4063.4  | 23.3  | 2.2  | 1.3  |
| 203538_at   | CAMLG /// FLJ25222 | 5905.6  | 3206.1  | 6355.2  | 5176.7  | 1.3   | 1.9  | 1.1  |
| 203583_at   | UNC50              | 2840.3  | 1726.5  | 2414.9  | 3615.1  | 2.0   | 1.7  | 1.1  |
| 204086_at   | PRAME              | 2376.2  | 108.2   | 308.6   | 2630.7  | 85.8  | 2.7  | 17.4 |
| 204126_s_at | CDC45L             | 619.6   | 95.5    | 631.4   | 1746.5  | 6.4   | 1.8  | 1.2  |
| 204170_s_at | CKS2               | 8155.2  | 1032.8  | 8784.4  | 11872.0 | 3.8   | 2.4  | 1.4  |
| 204478_s_at | RABIF              | 1626.2  | 684.7   | 3415.9  | 1191.6  | 1.3   | 11.4 | 1.3  |
| 204571_x_at | PIN4               | 723.8   | 1635.0  | 2629.6  | 2877.9  | 2.4   | 1.8  | 1.1  |
| 204659_s_at | GFER               | 563.4   | 200.7   | 1342.3  | 491.6   | 1.2   | 5.0  | 1.1  |
| 204695_at   | CDC25A             | 591.5   | 118.1   | 995.6   | 1106.4  | 2.5   | 2.1  | 1.1  |
| 204900_x_at | SAP30              | 2101.1  | 829.5   | 2134.1  | 4327.2  | 6.5   | 2.2  | 1.2  |
| 205077_s_at | PIGF               | 2312.8  | 1457.3  | 3481.2  | 4149.0  | 4.5   | 3.8  | 1.1  |
| 205224_at   | SURF2              | 1296.0  | 124.1   | 838.3   | 494.4   | 1.8   | 3.0  | 2.5  |
| 205376_at   | INPP4B             | 831.3   | 222.9   | 605.4   | 484.9   | 2.2   | 1.8  | 1.4  |
| 206218_at   | MAGEB2             | 1806.1  | 164.6   | 383.2   | 4142.2  | 327.1 | 2.8  | 10.2 |
| 206348_s_at | PDK3               | 486.2   | 111.1   | 650.6   | 1369.3  | 10.3  | 3.9  | 1.2  |
| 206441_s_at | COMMD4             | 1956.0  | 604.2   | 1156.6  | 1870.3  | 3.6   | 1.8  | 1.8  |
| 206451_at   | TBCCD1             | 1446.4  | 342.6   | 658.9   | 769.8   | 2.4   | 2.7  | 3.7  |
| 206506_s_at | SUPT3H             | 879.8   | 224.8   | 768.2   | 744.4   | 3.3   | 3.8  | 2.0  |
| 207534_at   | MAGEB1             | 611.8   | 58.4    | 280.2   | 3291.0  | 522.1 | 5.9  | 3.3  |
| 207844_at   | IL13               | 649.2   | 170.3   | 695.0   | 649.7   | 10.7  | 3.7  | 1.5  |
| 208424_s_at | CIAPIN1            | 1682.5  | 603.8   | 1737.3  | 2652.6  | 8.8   | 3.3  | 1.6  |
| 208805_at   | PSMA6              | 14600.5 | 5364.3  | 13838.6 | 19362.6 | 3.5   | 2.1  | 1.3  |
| 208968_s_at | CIAPIN1            | 6332.3  | 1526.4  | 3972.8  | 4604.3  | 3.2   | 2.4  | 2.5  |

|             |                           |         |        |         |         |       |      |      |
|-------------|---------------------------|---------|--------|---------|---------|-------|------|------|
| 209219_at   | RDBP                      | 4971.9  | 1314.4 | 4784.3  | 6440.4  | 5.6   | 2.8  | 1.5  |
| 209273_s_at | HBLD2                     | 2634.5  | 1079.0 | 3678.9  | 2804.1  | 2.7   | 5.9  | 1.4  |
| 209503_s_at | PSMC5                     | 4790.8  | 2685.2 | 4500.9  | 5328.5  | 2.0   | 2.1  | 1.1  |
| 209715_at   | CBX5                      | 1583.4  | 656.9  | 2077.1  | 1443.1  | 1.5   | 2.6  | 1.2  |
| 209853_s_at | PSME3                     | 1252.9  | 393.0  | 1099.5  | 1998.3  | 4.7   | 2.1  | 1.3  |
| 209965_s_at | RAD51L3                   | 610.4   | 291.8  | 546.5   | 453.8   | 1.1   | 1.7  | 1.1  |
| 210386_s_at | MTX1                      | 4331.6  | 1123.0 | 7628.0  | 4034.8  | 2.6   | 8.6  | 1.5  |
| 210437_at   | MAGEA9 /// MAGEA9B        | 850.8   | 123.5  | 1139.0  | 2565.0  | 205.4 | 82.7 | 3.1  |
| 210652_s_at | C1orf34                   | 953.4   | 282.5  | 1603.0  | 2906.3  | 16.4  | 5.8  | 1.2  |
| 211702_s_at | USP32                     | 2834.6  | 464.1  | 1198.0  | 698.2   | 1.6   | 3.1  | 5.9  |
| 211982_x_at | XPO6                      | 3117.8  | 1523.3 | 3434.9  | 3936.4  | 3.0   | 2.5  | 1.2  |
| 212527_at   | D15Wsu75e                 | 2127.0  | 459.2  | 1500.7  | 899.2   | 1.3   | 2.1  | 1.8  |
| 212691_at   | NUP188                    | 3216.9  | 599.7  | 1310.0  | 1434.0  | 2.0   | 1.8  | 3.7  |
| 213159_at   | PCNX                      | 786.5   | 301.8  | 828.7   | 660.8   | 2.3   | 2.9  | 1.3  |
| 213507_s_at | KPNB1                     | 10080.7 | 4480.0 | 7475.4  | 19512.6 | 8.5   | 1.7  | 1.4  |
| 213951_s_at | PSMC3IP                   | 1253.3  | 336.2  | 1013.7  | 946.7   | 2.0   | 2.6  | 1.7  |
| 214144_at   | POLR2D                    | 386.0   | 219.6  | 422.4   | 622.8   | 2.4   | 2.1  | 1.1  |
| 214264_s_at | C14orf143                 | 4287.7  | 382.9  | 1351.1  | 2017.7  | 13.8  | 8.1  | 20.2 |
| 214412_at   | H2AFB3 /// H2AFB1         | 848.9   | 47.1   | 796.3   | 1246.7  | 43.7  | 12.9 | 5.2  |
| 214431_at   | GMPS                      | 5653.1  | 802.5  | 2186.8  | 5964.8  | 10.1  | 1.7  | 3.6  |
| 214784_x_at | XPO6                      | 2641.9  | 1591.2 | 3408.5  | 2500.9  | 1.4   | 2.2  | 1.1  |
| 214838_at   | SFT2D2                    | 1180.6  | 334.2  | 2717.3  | 674.9   | 1.3   | 11.7 | 1.3  |
| 215227_x_at | ACP1                      | 3421.9  | 1455.0 | 11920.8 | 6989.0  | 4.5   | 16.2 | 1.1  |
| 217959_s_at | TRAPPC4                   | 1957.1  | 968.9  | 1763.1  | 4341.2  | 11.6  | 2.1  | 1.3  |
| 218305_at   | IPO4                      | 2405.6  | 478.7  | 1632.3  | 1102.4  | 1.5   | 2.6  | 2.5  |
| 218339_at   | MRPL22                    | 1566.6  | 715.5  | 1719.7  | 2670.2  | 4.5   | 2.1  | 1.2  |
| 218354_at   | TRAPPC2L                  | 3074.5  | 1026.7 | 1798.8  | 2032.1  | 2.3   | 1.8  | 2.0  |
| 218435_at   | DNAJC15                   | 4689.8  | 1813.5 | 6060.5  | 3407.0  | 2.6   | 2.8  | 1.2  |
| 218447_at   | C16orf61                  | 3799.2  | 1784.7 | 5558.2  | 5366.3  | 3.5   | 3.8  | 1.2  |
| 218558_s_at | MRPL39                    | 2896.0  | 1093.6 | 2379.0  | 5283.1  | 5.0   | 1.9  | 1.2  |
| 218580_x_at | AURKAIP1 ///<br>LOC643556 | 9192.1  | 2923.4 | 9580.4  | 7169.5  | 2.2   | 3.9  | 1.8  |
| 218647_s_at | YRDC                      | 1485.7  | 629.4  | 2003.1  | 3468.8  | 7.7   | 2.9  | 1.2  |
| 218695_at   | EXOSC4                    | 1725.6  | 266.4  | 974.0   | 1354.3  | 4.9   | 2.6  | 2.9  |
| 218830_at   | RPL26L1                   | 3763.4  | 1507.8 | 4423.0  | 7192.1  | 13.9  | 4.1  | 1.5  |
| 218860_at   | NOC4L                     | 828.3   | 157.9  | 1452.6  | 1094.3  | 2.4   | 4.3  | 1.2  |

|             |               |        |        |         |         |       |       |      |
|-------------|---------------|--------|--------|---------|---------|-------|-------|------|
| 219050_s_at | ZNHIT2        | 874.2  | 101.9  | 373.7   | 266.5   | 1.2   | 2.0   | 2.6  |
| 219060_at   | C8orf32       | 1262.5 | 691.2  | 1841.8  | 3063.6  | 9.7   | 4.4   | 1.1  |
| 219161_s_at | CKLF          | 1926.7 | 714.1  | 3896.1  | 4005.1  | 7.9   | 8.1   | 1.2  |
| 219253_at   | FAM11B        | 772.9  | 339.6  | 1052.6  | 1894.3  | 15.3  | 6.8   | 1.3  |
| 219350_s_at | DIABLO        | 4877.1 | 1760.7 | 3094.9  | 4135.5  | 4.1   | 2.2   | 2.4  |
| 219526_at   | C14orf169     | 1736.6 | 725.0  | 1636.2  | 1902.1  | 4.0   | 2.3   | 1.5  |
| 219531_at   | CEP72         | 519.5  | 169.2  | 1217.7  | 1252.4  | 17.5  | 20.9  | 1.2  |
| 219539_at   | GEMIN6        | 1449.9 | 340.9  | 1360.4  | 2307.0  | 14.4  | 6.0   | 2.2  |
| 219785_s_at | FBXO31        | 6118.3 | 276.3  | 2033.7  | 1250.4  | 2.2   | 4.1   | 9.6  |
| 220118_at   | ZBTB32        | 2259.6 | 137.4  | 3477.4  | 960.6   | 1.2   | 4.1   | 1.3  |
| 220239_at   | KLHL7         | 2938.3 | 263.1  | 1069.0  | 2561.2  | 29.0  | 3.9   | 7.1  |
| 220445_s_at | CSAG2         | 49.6   | 22.2   | 441.4   | 859.5   | 175.2 | 50.7  | 1.1  |
| 220688_s_at | C1orf33       | 1071.3 | 674.1  | 1720.6  | 2572.6  | 7.8   | 2.7   | 1.1  |
| 220966_x_at | ARPC5L        | 5501.6 | 2428.4 | 5117.2  | 6547.4  | 2.2   | 1.8   | 1.2  |
| 221058_s_at | CKLF          | 1088.7 | 561.7  | 3031.8  | 2202.3  | 6.7   | 12.4  | 1.1  |
| 221185_s_at | IQCG          | 2107.5 | 342.0  | 16310.0 | 7940.4  | 87.5  | 809.1 | 2.2  |
| 221598_s_at | CRSP8         | 368.9  | 155.0  | 408.0   | 819.2   | 2.8   | 1.7   | 1.1  |
| 221797_at   | LOC339229     | 723.9  | 278.5  | 1774.0  | 808.1   | 1.6   | 5.8   | 1.1  |
| 221845_s_at | CLPB          | 7681.7 | 132.4  | 565.9   | 471.7   | 1.9   | 2.3   | 93.8 |
| 221979_at   | NDUFB6        | 1250.2 | 317.3  | 733.2   | 559.7   | 1.2   | 2.3   | 1.6  |
| 222530_s_at | MKKS          | 2265.1 | 912.2  | 2167.8  | 1144.7  | 1.6   | 2.5   | 1.3  |
| 222684_s_at | NOL10         | 2567.4 | 1038.8 | 2085.9  | 2338.8  | 2.3   | 1.9   | 1.5  |
| 222703_s_at | YRDC          | 727.3  | 199.5  | 1035.4  | 1698.9  | 9.1   | 3.6   | 1.3  |
| 222713_s_at | FANCF         | 906.3  | 294.2  | 714.3   | 721.5   | 1.7   | 1.8   | 1.5  |
| 222768_s_at | CGI-09        | 1448.1 | 641.7  | 1671.4  | 2746.0  | 9.9   | 4.5   | 1.4  |
| 222792_s_at | CCDC59        | 1734.3 | 999.0  | 4140.3  | 1967.4  | 1.8   | 7.7   | 1.1  |
| 223086_x_at | MRPL51        | 6529.9 | 3499.2 | 7310.5  | 9040.4  | 3.7   | 2.8   | 1.2  |
| 223101_s_at | ARPC5L        | 3153.3 | 1086.7 | 2343.1  | 1698.4  | 1.1   | 1.7   | 1.6  |
| 223368_s_at | C9orf32       | 2679.4 | 642.5  | 2982.9  | 1845.5  | 1.9   | 4.9   | 1.7  |
| 223407_at   | C16orf48      | 1121.6 | 264.3  | 791.7   | 511.0   | 1.5   | 1.8   | 1.7  |
| 223413_s_at | LYAR          | 5903.6 | 611.9  | 1525.5  | 2484.9  | 7.1   | 2.3   | 10.8 |
| 223414_s_at | LYAR          | 2527.5 | 605.0  | 1953.8  | 1532.4  | 2.2   | 4.2   | 2.3  |
| 223451_s_at | CKLF          | 1692.8 | 789.1  | 4549.3  | 2448.0  | 4.5   | 15.5  | 1.2  |
| 223452_s_at | DKFZP564J0863 | 3026.8 | 250.9  | 1265.7  | 1293.7  | 3.5   | 4.1   | 5.5  |
| 223480_s_at | MRPL47        | 5945.2 | 1961.2 | 9061.0  | 11764.7 | 20.9  | 19.5  | 2.0  |
| 223538_at   | SERF1A        | 8944.9 | 1311.1 | 3459.0  | 3198.3  | 3.2   | 3.8   | 8.9  |



|             |                           |         |        |         |         |       |      |       |
|-------------|---------------------------|---------|--------|---------|---------|-------|------|-------|
| 223677_at   | ATG10                     | 579.2   | 259.9  | 434.8   | 429.3   | 1.5   | 1.7  | 1.3   |
| 223689_at   | IGF2BP1                   | 148.3   | 48.5   | 293.3   | 241.1   | 2.3   | 3.2  | 1.1   |
| 223791_at   | FAM27A                    | 595.6   | 72.8   | 527.8   | 238.3   | 1.8   | 5.2  | 2.2   |
| 223808_s at | PTPMT1                    | 1833.3  | 576.6  | 2360.3  | 1970.3  | 5.4   | 8.4  | 2.1   |
| 223811_s at | C7orf20                   | 595.5   | 233.0  | 520.0   | 409.9   | 1.2   | 1.7  | 1.2   |
| 223917_s at | SLC39A3                   | 4130.2  | 691.2  | 1988.2  | 1084.9  | 1.2   | 2.4  | 3.8   |
| 224301_x at | H2AFJ                     | 16151.5 | 1574.9 | 4972.5  | 2473.4  | 1.2   | 2.2  | 3.7   |
| 224365_s at | TIGD7                     | 915.7   | 483.4  | 450.0   | 110.2   | 1.2   | 1.7  | 1.1   |
| 224467_s at | PDCD2L                    | 943.5   | 447.8  | 1045.7  | 1570.4  | 5.3   | 2.6  | 1.3   |
| 224733_at   | CMTM3                     | 2725.1  | 658.7  | 2514.4  | 1845.6  | 2.0   | 3.1  | 1.9   |
| 224885_s at | KRTCAP2                   | 8298.6  | 3981.1 | 8409.4  | 8382.0  | 1.6   | 1.9  | 1.2   |
| 224903_at   | CIRH1A                    | 2757.4  | 1147.6 | 3264.6  | 10327.1 | 15.5  | 1.8  | 1.1   |
| 225075_at   | PDRG1                     | 2574.7  | 818.8  | 1667.7  | 1468.6  | 1.7   | 2.4  | 1.9   |
| 225082_at   | CPSF3                     | 3369.9  | 1020.2 | 4170.7  | 7191.9  | 4.3   | 2.0  | 1.1   |
| 225156_at   | ELOF1                     | 4086.2  | 1143.0 | 1917.2  | 1596.2  | 1.3   | 2.2  | 3.0   |
| 225441_x at | LSMD1                     | 3609.1  | 1451.0 | 4986.3  | 3054.6  | 1.7   | 3.3  | 1.3   |
| 225472_at   | BAT4                      | 3315.3  | 1149.5 | 5063.1  | 4191.5  | 1.9   | 2.4  | 1.1   |
| 225552_x at | AURKAIP1 ///<br>LOC643556 | 9796.4  | 3043.1 | 12397.0 | 9093.6  | 3.2   | 6.1  | 1.8   |
| 225765_at   | TNPO1                     | 1764.2  | 765.2  | 1206.5  | 3446.8  | 5.4   | 1.8  | 1.2   |
| 225802_at   | TOP1MT                    | 827.3   | 273.2  | 1052.9  | 940.2   | 1.6   | 2.0  | 1.1   |
| 225898_at   | WDR54                     | 3225.6  | 933.7  | 6003.7  | 6801.6  | 14.3  | 10.0 | 1.6   |
| 225908_at   | LOC285148                 | 4271.4  | 1461.5 | 3013.4  | 2860.6  | 7.7   | 3.9  | 2.4   |
| 226024_at   | COMMD1                    | 2981.0  | 1656.8 | 2878.6  | 3326.4  | 2.1   | 2.2  | 1.2   |
| 226089_at   | RABL3 /// LOC653256       | 452.6   | 237.1  | 414.0   | 296.7   | 1.1   | 1.8  | 1.1   |
| 226196_s at | C14orf179                 | 1341.4  | 629.6  | 1946.3  | 1001.0  | 1.3   | 4.1  | 1.3   |
| 226243_at   | LOC391356                 | 2787.5  | 1151.6 | 3558.3  | 4381.0  | 6.1   | 3.8  | 1.4   |
| 226254_s at | KIAA1430                  | 4710.5  | 1794.4 | 3625.6  | 6380.9  | 4.3   | 1.8  | 1.3   |
| 226278_at   | DKFZp313A2432             | 2902.0  | 1020.3 | 3127.6  | 2720.3  | 1.4   | 2.1  | 1.2   |
| 226320_at   | THOC4                     | 1723.3  | 557.1  | 1284.2  | 1569.6  | 2.4   | 1.8  | 1.3   |
| 226434_at   | MGC22793                  | 3177.8  | 883.7  | 1827.9  | 1838.1  | 1.7   | 1.7  | 2.2   |
| 226565_at   | TMEM99                    | 4904.6  | 602.4  | 2473.9  | 1601.9  | 2.7   | 5.5  | 4.7   |
| 227037_at   | LOC201164                 | 2102.6  | 571.8  | 1202.6  | 1017.7  | 1.7   | 2.9  | 2.8   |
| 227678_at   | XRCC6BP1                  | 2472.1  | 444.4  | 1091.8  | 2432.6  | 7.7   | 2.5  | 3.0   |
| 227711_at   | FAM112B                   | 10990.0 | 283.1  | 1512.4  | 5573.4  | 174.2 | 17.6 | 170.1 |
| 227901_at   | LOC648987                 | 236.3   | 95.2   | 222.4   | 256.0   | 1.6   | 2.4  | 1.2   |

|             |                                                                                            |        |       |         |         |        |        |      |
|-------------|--------------------------------------------------------------------------------------------|--------|-------|---------|---------|--------|--------|------|
| 227904_at   | AZI2                                                                                       | 650.8  | 237.1 | 486.3   | 938.6   | 5.2    | 2.6    | 1.5  |
| 227916_x_at | EXOSC3                                                                                     | 1163.1 | 487.5 | 1299.6  | 3351.7  | 12.6   | 2.6    | 1.2  |
| 227941_at   | LOC339803                                                                                  | 1679.0 | 440.1 | 1729.1  | 1035.2  | 1.7    | 4.5    | 2.0  |
| 227972_at   | TOR2A                                                                                      | 561.4  | 209.7 | 643.2   | 434.7   | 1.2    | 2.1    | 1.1  |
| 228066_at   | LOC642705                                                                                  | 566.6  | 102.5 | 2506.1  | 868.1   | 3.5    | 24.6   | 1.3  |
| 228774_at   | CEP78                                                                                      | 1841.7 | 528.3 | 2398.0  | 1336.0  | 1.3    | 3.1    | 1.3  |
| 228899_at   | CUL1                                                                                       | 736.4  | 300.8 | 517.3   | 1126.9  | 6.7    | 3.2    | 1.3  |
| 229106_at   | DYNLL2                                                                                     | 3844.1 | 420.4 | 1594.0  | 786.5   | 1.7    | 4.9    | 9.7  |
| 229716_at   | ---                                                                                        | 713.2  | 225.0 | 1453.5  | 135.9   | 1.2    | 7.3    | 1.2  |
| 230026_at   | MRPL43                                                                                     | 1336.2 | 439.9 | 1509.8  | 1143.0  | 1.4    | 2.3    | 1.2  |
| 230425_at   | EPHB1                                                                                      | 991.0  | 335.0 | 1121.0  | 6127.5  | 48.5   | 2.3    | 1.1  |
| 230860_at   | ---                                                                                        | 704.8  | 212.1 | 544.8   | 581.4   | 1.9    | 1.8    | 1.4  |
| 230871_at   | DHX30                                                                                      | 2230.5 | 776.0 | 1681.4  | 1044.3  | 1.2    | 2.3    | 1.6  |
| 230924_at   | TTLL6                                                                                      | 1966.1 | 70.5  | 534.8   | 200.3   | 2.2    | 5.8    | 21.7 |
| 230966_at   | IL4I1                                                                                      | 800.8  | 109.6 | 6052.4  | 3537.5  | 87.1   | 135.3  | 1.7  |
| 231303_at   | C21orf42                                                                                   | 760.7  | 105.4 | 295.6   | 791.2   | 14.3   | 2.7    | 3.8  |
| 231730_at   | SLA/LP                                                                                     | 395.2  | 119.9 | 305.8   | 433.5   | 2.1    | 2.1    | 1.3  |
| 231769_at   | FBXO6                                                                                      | 995.9  | 403.0 | 8679.7  | 1655.0  | 5.8    | 193.9  | 1.2  |
| 232798_at   | DNAJC5B                                                                                    | 825.1  | 274.2 | 1735.8  | 1786.5  | 26.9   | 13.1   | 1.4  |
| 234016_at   | LOC90499                                                                                   | 1136.6 | 50.8  | 172.1   | 101.1   | 1.3    | 1.9    | 9.7  |
| 235088_at   | LOC201725                                                                                  | 946.6  | 149.6 | 410.6   | 2852.4  | 44.5   | 1.8    | 2.2  |
| 235700_at   | RP13-36C9.1 /// RP13-36C9.3 /// CT45-4 /// RP13-36C9.6 /// CT45-6 /// CT45-1 /// LOC653515 | 2208.2 | 102.8 | 10692.6 | 17429.9 | 3777.3 | 3084.5 | 15.7 |
| 237065_s_at | ---                                                                                        | 909.8  | 169.3 | 424.8   | 286.5   | 2.0    | 2.4    | 2.8  |
| 237105_at   | ---                                                                                        | 302.5  | 139.1 | 407.2   | 777.6   | 13.9   | 3.1    | 1.1  |
| 237344_at   | FLJ45743                                                                                   | 1676.6 | 88.1  | 327.3   | 169.0   | 1.6    | 4.2    | 15.9 |
| 240037_at   | KIAA1754L                                                                                  | 891.2  | 266.0 | 607.5   | 318.4   | 1.1    | 1.7    | 1.6  |
| 240744_at   | CPA5                                                                                       | 806.5  | 98.9  | 369.5   | 221.2   | 2.4    | 2.6    | 3.1  |
| 242069_at   | CBX5                                                                                       | 290.7  | 66.5  | 519.8   | 394.8   | 3.0    | 6.5    | 1.2  |
| 244519_at   | ASXL1                                                                                      | 824.1  | 350.7 | 3095.1  | 1770.7  | 4.8    | 17.7   | 1.1  |
| 36566_at    | CTNS                                                                                       | 1143.3 | 506.9 | 1482.3  | 1906.4  | 6.0    | 2.6    | 1.1  |
| 51146_at    | GFRA1 /// PIGV                                                                             | 2133.2 | 363.3 | 549.9   | 475.9   | 1.1    | 1.7    | 6.0  |
| 58696_at    | EXOSC4                                                                                     | 2228.9 | 606.9 | 1814.5  | 2050.0  | 4.8    | 3.6    | 2.3  |
| 59705_at    | SCLY                                                                                       | 394.7  | 172.8 | 777.6   | 331.1   | 1.5    | 6.0    | 1.2  |

|          |        |        |       |       |       |     |     |     |
|----------|--------|--------|-------|-------|-------|-----|-----|-----|
| 78383_at | NDUFB6 | 1153.3 | 432.7 | 768.8 | 475.2 | 1.1 | 2.2 | 1.7 |
|----------|--------|--------|-------|-------|-------|-----|-----|-----|

Supplementary Table 4. Detection of PRAME-reactive T cells in primed PBMC. PBMC were stimulated with DC that had been transfected with total RNA from L-1236 cells or without RNA (H<sub>2</sub>O). PRAME specific T cells were identified by pentamer staining using pentamers corresponding to PRAME peptides ALY or VLD (ALY/HLA-A2, VLD/HLA-A2). Presented are percentages of pentamer reactive cells from 4 independent donors. Each combination of L-1236 and H<sub>2</sub>O represents a single experiment. In one experiment (donor 4), RNA from SK-N-MC sarcoma cells was used for control transfection. For donors 1 and 3 stimulation was performed in duplicates. For donor 3, cells were analyzed at 4 different time points (t1-t4). -: not done.

| Donor number | Transfected RNA  | Pentamer positive cells [%] |                     |
|--------------|------------------|-----------------------------|---------------------|
|              |                  | ALY/HLA-A2-pentamer         | VLD/HLA-A2-pentamer |
| 1(1)         | H <sub>2</sub> O | 0.051                       | -                   |
| 1(1)         | L-1236           | 0.069                       | -                   |
| 1(2)         | H <sub>2</sub> O | 0.041                       | -                   |
| 1(2)         | L-1236           | 0.058                       | -                   |
| 2            | H <sub>2</sub> O | 0.035                       | 0.034               |
| 2            | L-1236           | 0.124                       | 0.037               |
| 3(t1)        | H <sub>2</sub> O | 0.018                       | 0.025               |
| 3(t1;1)      | L-1236           | 0.014                       | 0.041               |
| 3(t1;2)      | L-1236           | 0.011                       | 0.036               |
| 3(t2)        | H <sub>2</sub> O | 0.070                       | 0.203               |
| 3(t2)        | L-1236           | 0.044                       | 0.344               |
| 3(t3)        | H <sub>2</sub> O | 0.154                       | 0.098               |
| 3(t3)        | L-1236           | 0.526                       | 0.290               |
| 3(t4)        | H <sub>2</sub> O | 0.143                       | 0.176               |
| 3(t4)        | L-1236           | 0.707                       | 0.360               |
| 4            | SK-N-MC          | 0.428                       | 0.196               |
| 4            | L-1236           | 0.525                       | 0.457               |
